# Supplementary material
Source: PubMed Central journal article supplement (PMC6646188)

# **A Rapid Screen of Potential i-Motif Forming Sequences in DNA Repair Gene Promoters**

R. Aaron Rogers\*, Aaron M. Fleming\*, Cynthia J. Burrows\*

\*Dept. of Chemistry, Univ. of Utah, 315 South 1400 East, Salt Lake City, Utah 84112,

USA

**Supporting Information**

**Table S1:** Tabulated results for all oligodeoxynucleotides studied; Low pH CD maxima; IDS  $\lambda_{\max}$  pHT values ( $\pm$  std. error);  $T_M$  values ( $\pm$  std. error); calculated UV molar absorptivity values at 260 nm ( $\epsilon_{260}$ ).

| Sequence Name                | CD $\lambda_{\max}$<br>(nm) | IDS $\lambda_{\max}$<br>(nm) | IDS $\lambda_{\min}$<br>(nm) | pHT<br>( $\pm$ std. error) | $T_M$ at pH 5<br>( $\pm$ std. error)<br>in °C | $T_M$ at pH 6<br>( $\pm$ std. error)<br>in °C | $\epsilon_{260}$<br>(L $\mu\text{mol}^{-1}$<br>$\text{cm}^{-1}$ ) |
|------------------------------|-----------------------------|------------------------------|------------------------------|----------------------------|-----------------------------------------------|-----------------------------------------------|-------------------------------------------------------------------|
| <i>APE1</i> – 4 track        | 286.6                       | 243.7                        | 292.4                        | 6.07 (0.01)                | 55.6 (0.1)                                    | 24.0 (1.2)                                    | 0.1827                                                            |
| <i>APE1</i> – 5 track        | 285.9                       | 241.1                        | 291.5                        | 6.15 (0.02)                | 56.1 (0.1)                                    | 37.1 (2.4)                                    | 0.2935                                                            |
| <i>FEN1</i>                  | 284.8                       | 240.8                        | 292.2                        | 6.36 (0.03)                | 58.0 (0.1)                                    | 37.1 (0.1)                                    | 0.4249                                                            |
| <i>MGMT</i>                  | 286.0                       | 243.2                        | 293.9                        | 6.67 (0.03)                | 72.6 (0.1)                                    | 47.7 (0.3)                                    | 0.3611                                                            |
| <i>NEIL1</i>                 | 286.9                       | 241.6                        | 293.4                        | 6.48 (0.01)                | 63.3 (0.1)                                    | 37.5 (0.3)                                    | 0.2232                                                            |
| <i>NEIL2</i> – 4 track       | 286.5                       | 242.2                        | 292.8                        | 5.68 (0.02)                | 57.6 (0.7)                                    | ND                                            | 0.1802                                                            |
| <i>NEIL2</i> – 5 track       | 286.7                       | 243.6                        | 293.1                        | 6.09 (0.02)                | 39.8 (1.8)                                    | ND                                            | 0.2659                                                            |
| <i>NEIL2</i> – 6 track       | 286.7                       | 243.5                        | 294.0                        | 6.30 (0.03)                | 55.8 (0.9)                                    | 32.2 (1.2)                                    | 0.3046                                                            |
| <i>NEIL3</i> – 4 track       | 287.5                       | 240.3                        | 291.1                        | 5.14 (0.02)                | ND                                            | ND                                            | 0.2086                                                            |
| <i>NEIL3</i> – 5 track       | 286.0                       | 240.9                        | 291.1                        | 5.79 (0.01)                | 55.7 (1.2)                                    | ND                                            | 0.3023                                                            |
| <i>NTHL1</i> – 4 track       | 285.3                       | 240.6                        | 291.5                        | 5.34 (0.01)                | 59.5 (1.4)                                    | ND                                            | 0.2099                                                            |
| <i>NTHL1</i> – 5 track       | 286.1                       | 249.5                        | 294.3                        | 5.65 (0.02)                | 57.7 (0.2)                                    | ND                                            | 0.3044                                                            |
| <i>PCNA</i> – Sequence 1     | 285.9                       | 242.2                        | 292.8                        | 5.91 (0.02)                | 59.7 (0.1)                                    | 45.1 (1.9)                                    | 0.3017                                                            |
| <i>PCNA</i> – Sequence 2     | 287.3                       | 240.1                        | 292.5                        | 6.63 (0.02)                | 68.0 (0.1)                                    | 45.4 (0.4)                                    | 0.2647                                                            |
| <i>Poi<math>\beta</math></i> | 286.5                       | 240.8                        | 293.5                        | 6.46 (0.01)                | 61.2 (0.4)                                    | 37.4 (0.2)                                    | 0.2519                                                            |
| <i>Poi<math>\eta</math></i>  | 287.1                       | 239.9                        | 291.2                        | 6.19 (0.01)                | 56.4 (0.1)                                    | 31.3 (0.7)                                    | 0.2255                                                            |
| <i>RAD17</i> – Sequence 1    | 287.4                       | 240.3                        | 293.5                        | 6.24 (0.01)                | 56.3 (0.1)                                    | 33.3 (0.1)                                    | 0.2835                                                            |
| <i>RAD17</i> – Sequence 2    | 288.5                       | 239.9                        | 293.9                        | 6.90 (0.02)                | 74.5 (0.1)                                    | 63.2 (0.3)                                    | 0.2005                                                            |
| <i>RAD21</i>                 | 286.0                       | 240.2                        | 293.5                        | 6.53 (0.04)                | 64.7 (0.1)                                    | 40.7 (0.1)                                    | 0.3017                                                            |
| <i>RAD54L</i>                | 287.6                       | 239.7                        | 295.0                        | 6.51 (0.04)                | 71.3 (0.1)                                    | 45.0 (0.2)                                    | 0.3649                                                            |
| <i>UDG</i> – 4 track         | 286.9                       | 241.4                        | 292.8                        | 6.69 (0.02)                | 60.1 (0.1)                                    | 35.0 (0.4)                                    | 0.2196                                                            |
| <i>UDG</i> – 5 track         | 285.6                       | 244.2                        | 293.0                        | 6.26 (0.03)                | 58.6 (0.1)                                    | 38.7 (0.3)                                    | 0.4926                                                            |
| <i>XRCC2</i>                 | 285.1                       | 241.1                        | 292.7                        | 5.99 (0.08)                | 48.6 (0.1)                                    | 31.4 (0.6)                                    | 0.4162                                                            |
| <i>XRCC3</i>                 | 287.0                       | 241.3                        | 293.4                        | 5.78 (0.05)                | 61.3 (0.3)                                    | 45.0 (1.0)                                    | 0.2522                                                            |
| <i>XRCC5</i>                 | 284.6                       | 240.6                        | 293.2                        | 6.44 (0.02)                | 56.1 (0.2)                                    | 34.3 (0.1)                                    | 0.2475                                                            |

**Figures S1 – S25;** Example pH-dependent CD spectra from a single replicate experiment (left); pH<sub>T</sub> regression curves using data extracted from pH-dependent CD spectra at the CD maximum wavelength *circa* 285 nm; representative normalized T<sub>M</sub> curves at pH 5 and 6.

**Figure S1: APE1 – 4 track**

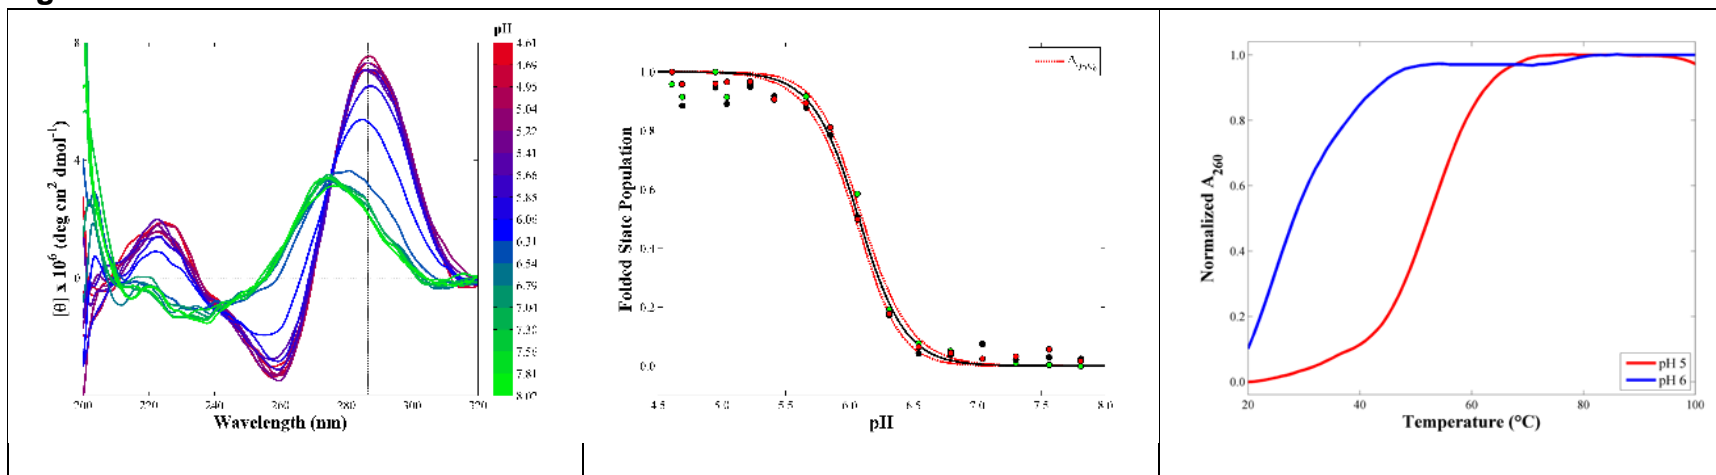

**Figure S2: APE1 – 5 track**

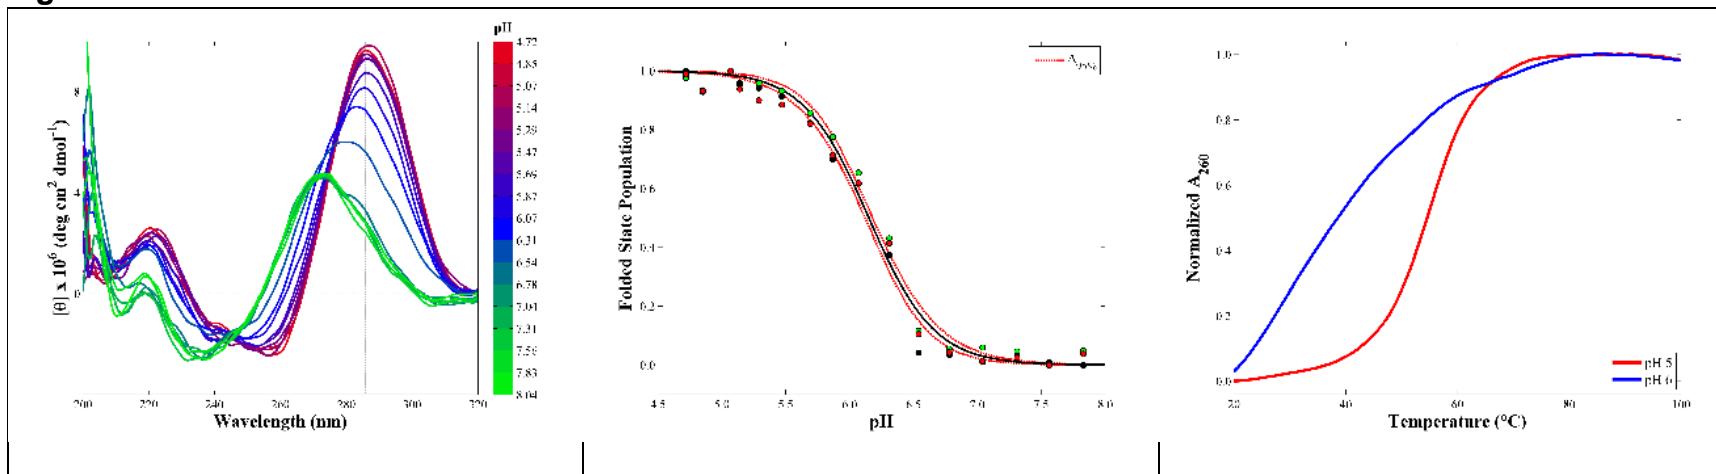

Figure S3: *FEN1*

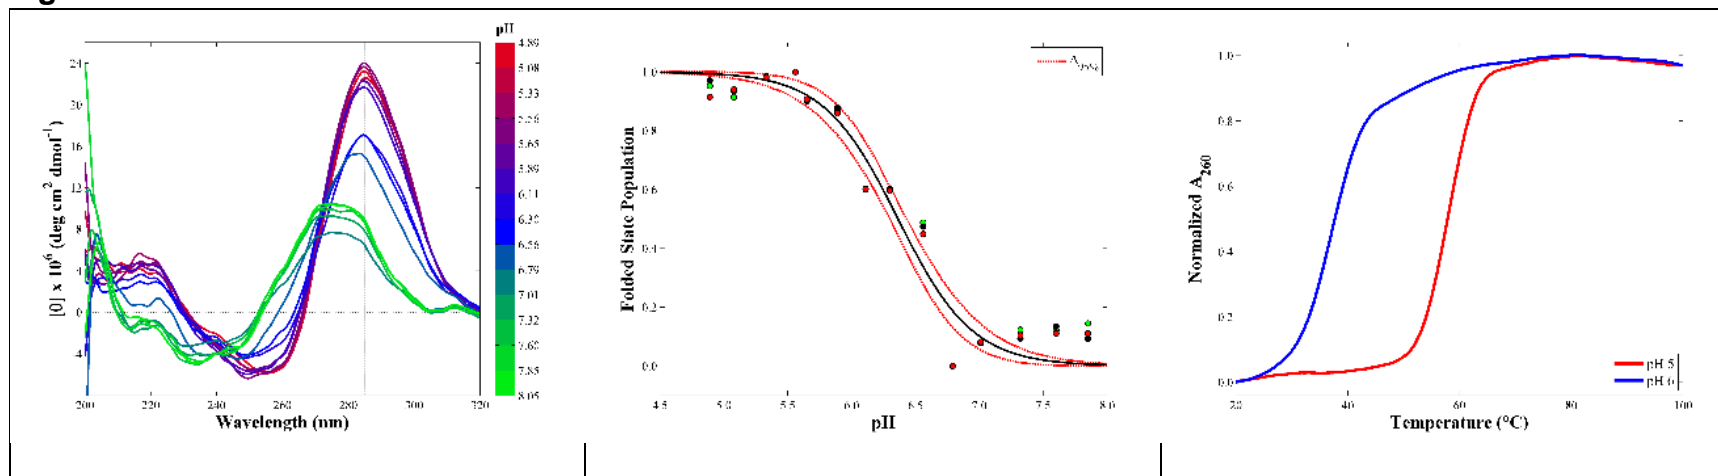

Figure S4: *MGMT*

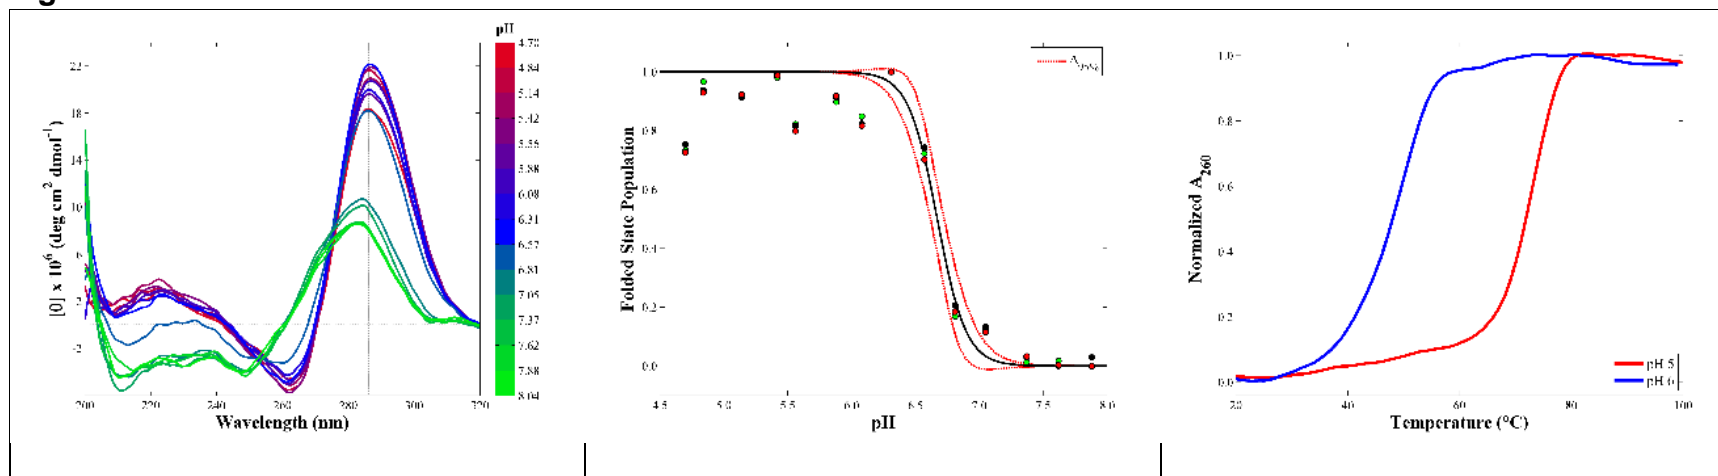

Figure S5: NEIL1

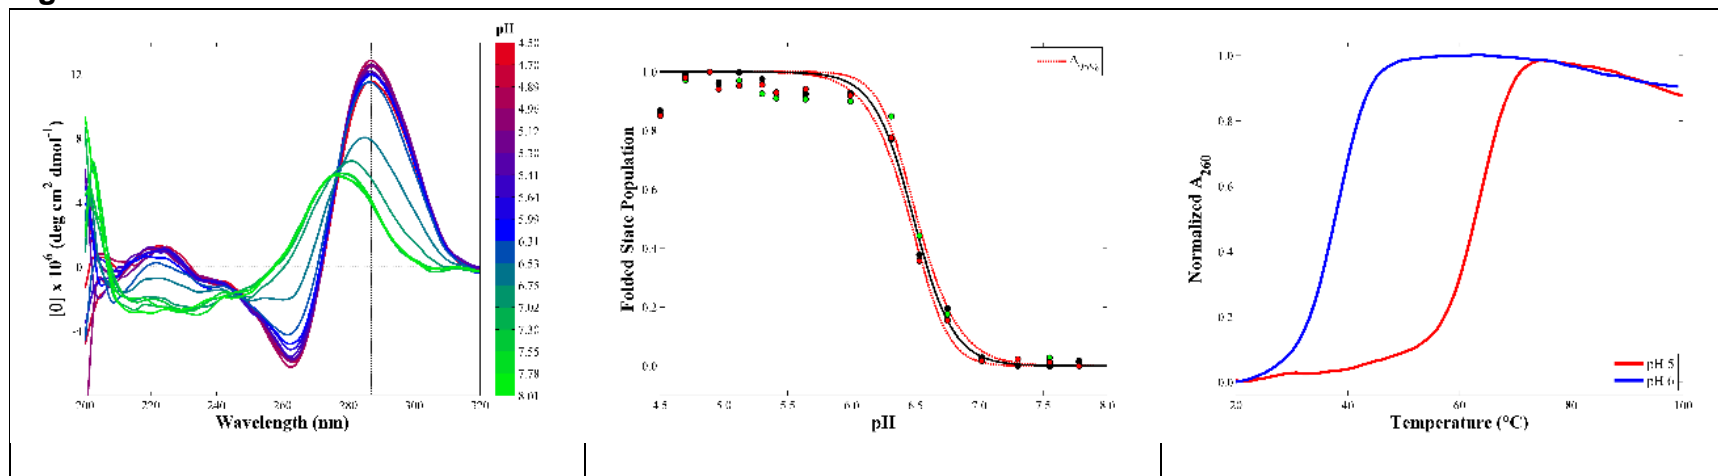

Figure S6: NEIL2 – 4 track

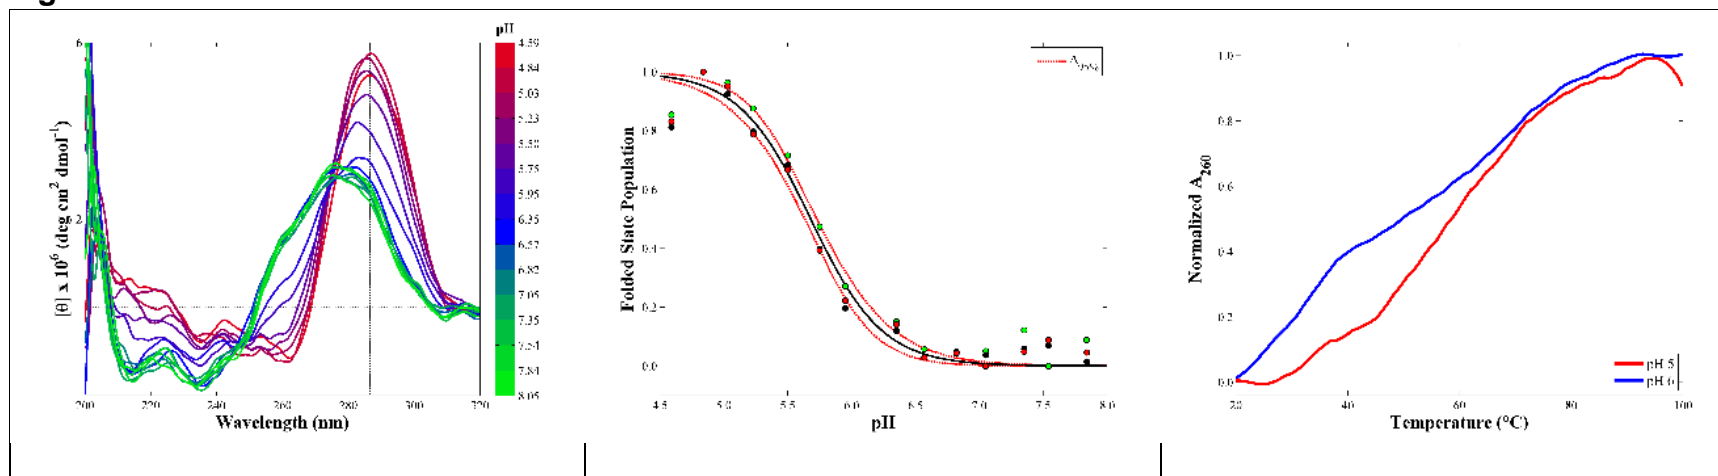

Figure S7: NEIL2 – 5 track

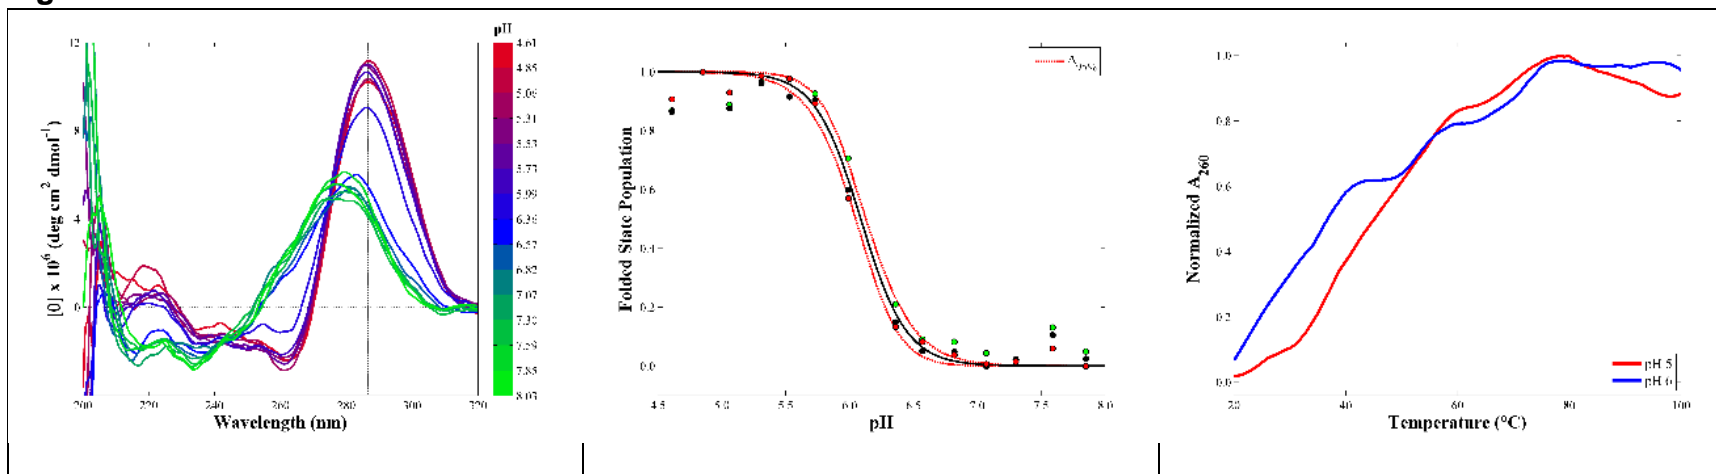

Figure S8: NEIL2 – 6 track

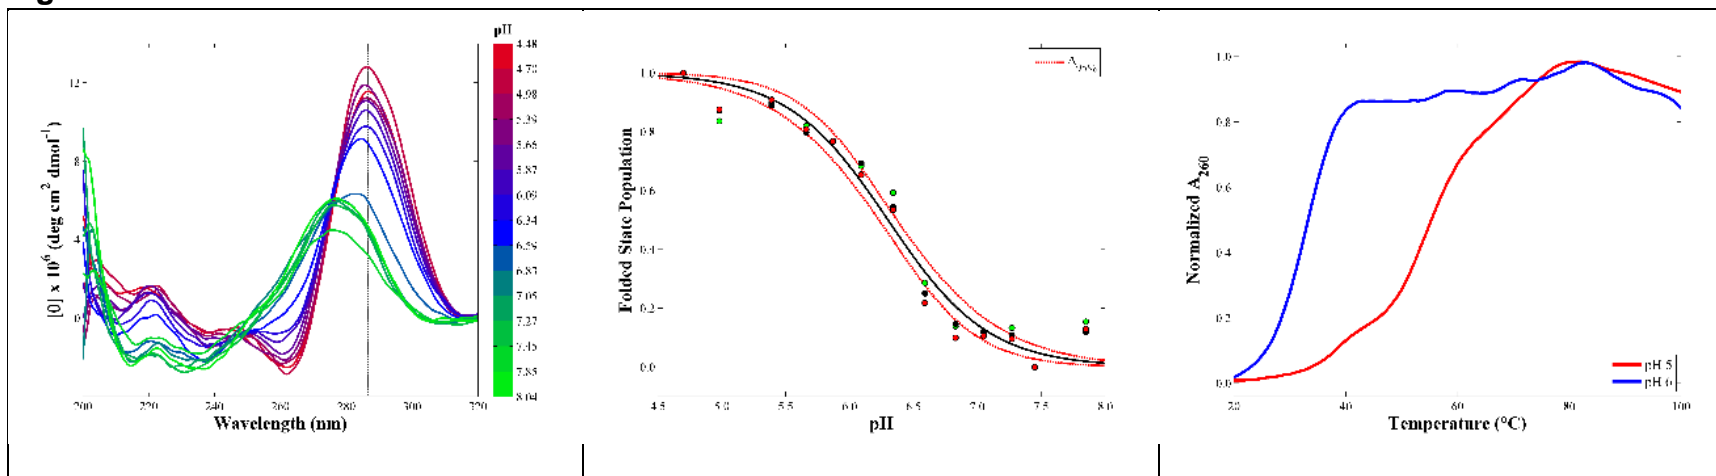

Figure S9: NEIL3 – 4 track

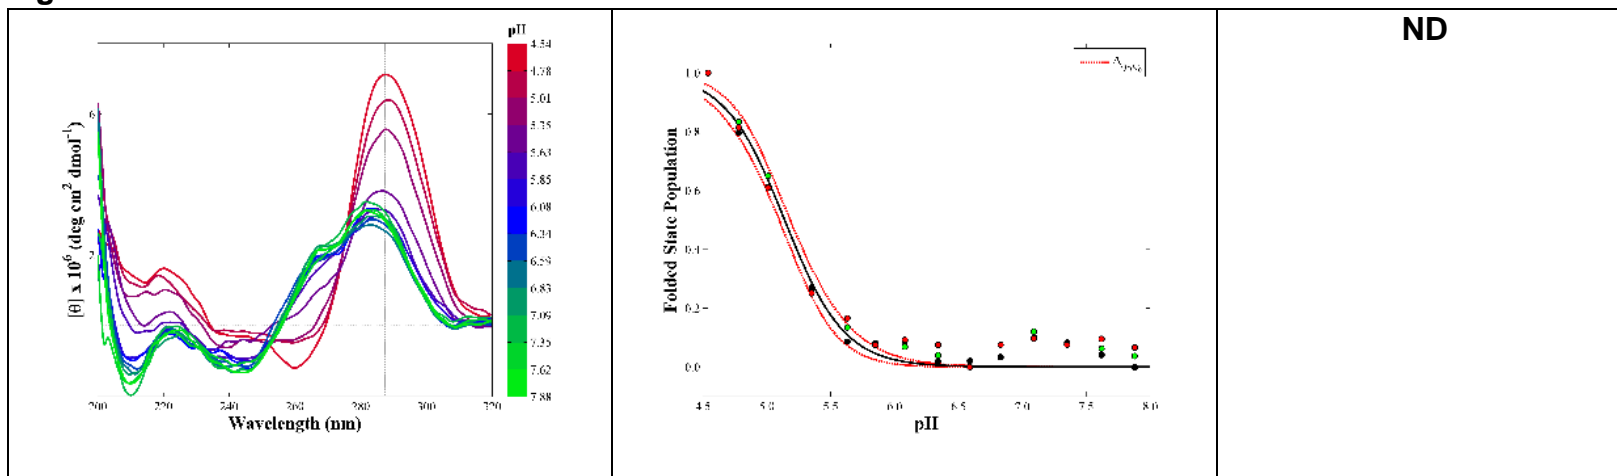

Figure S10: NEIL3 – 5 track

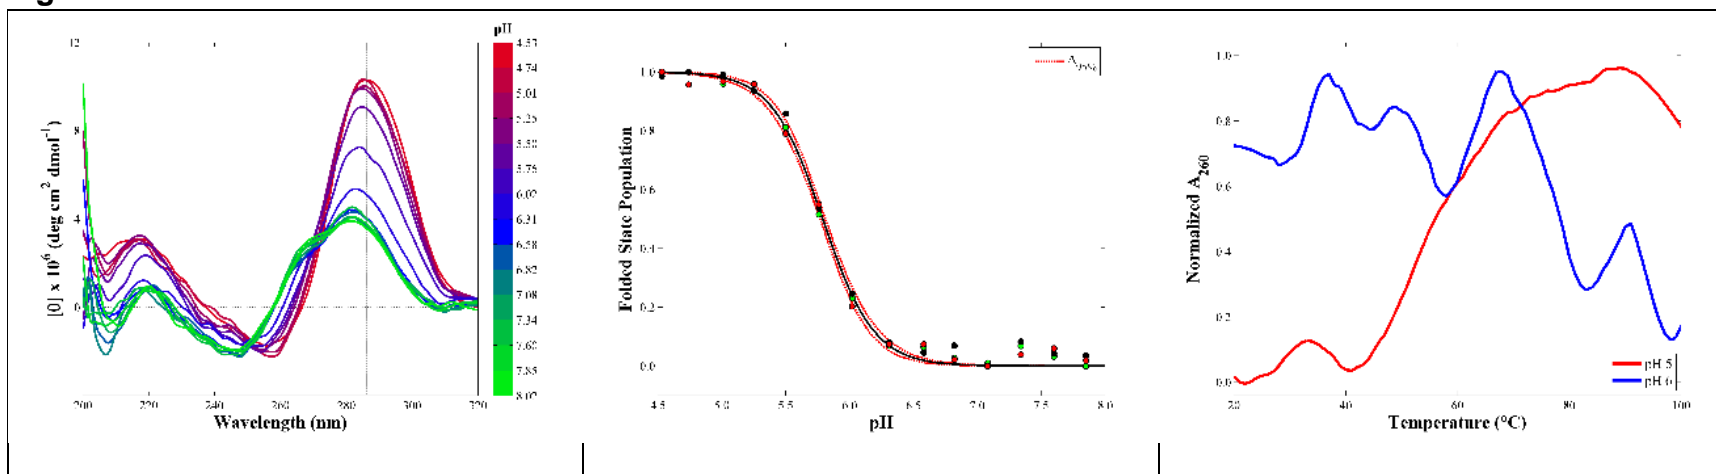

Figure S11: *NTHL1* – 4 track

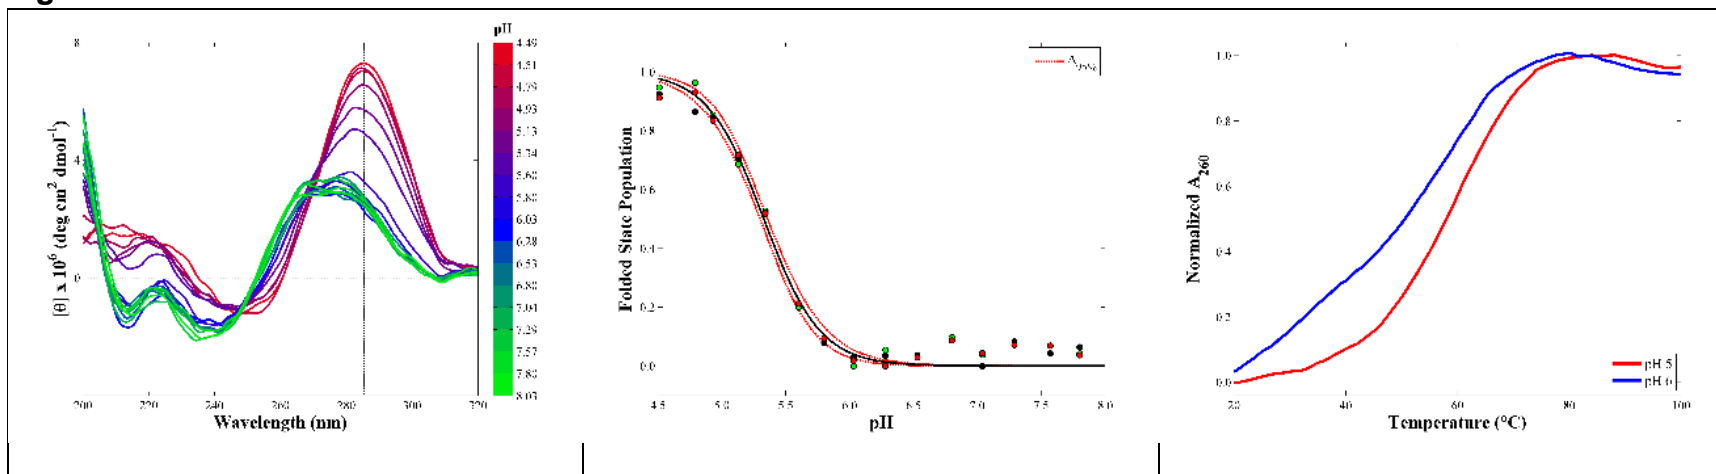

Figure S12: *NTHL1* – 5 track

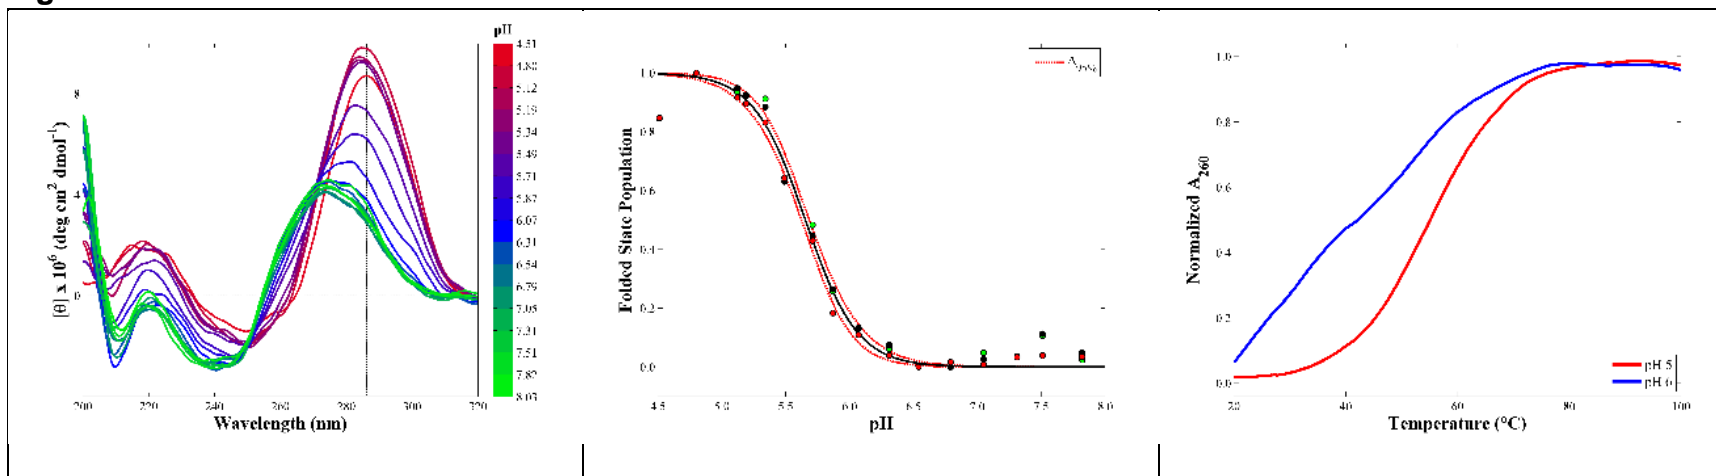



Figure S13: PCNA – Sequence 1

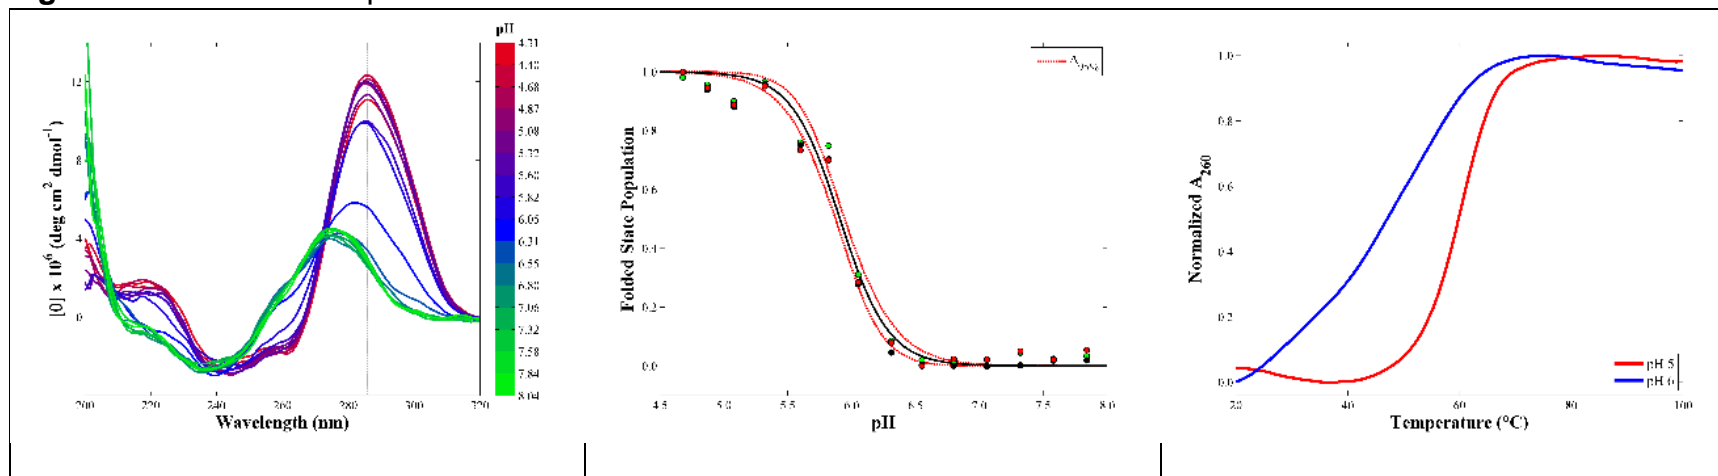

Figure S14: PCNA – Sequence 2

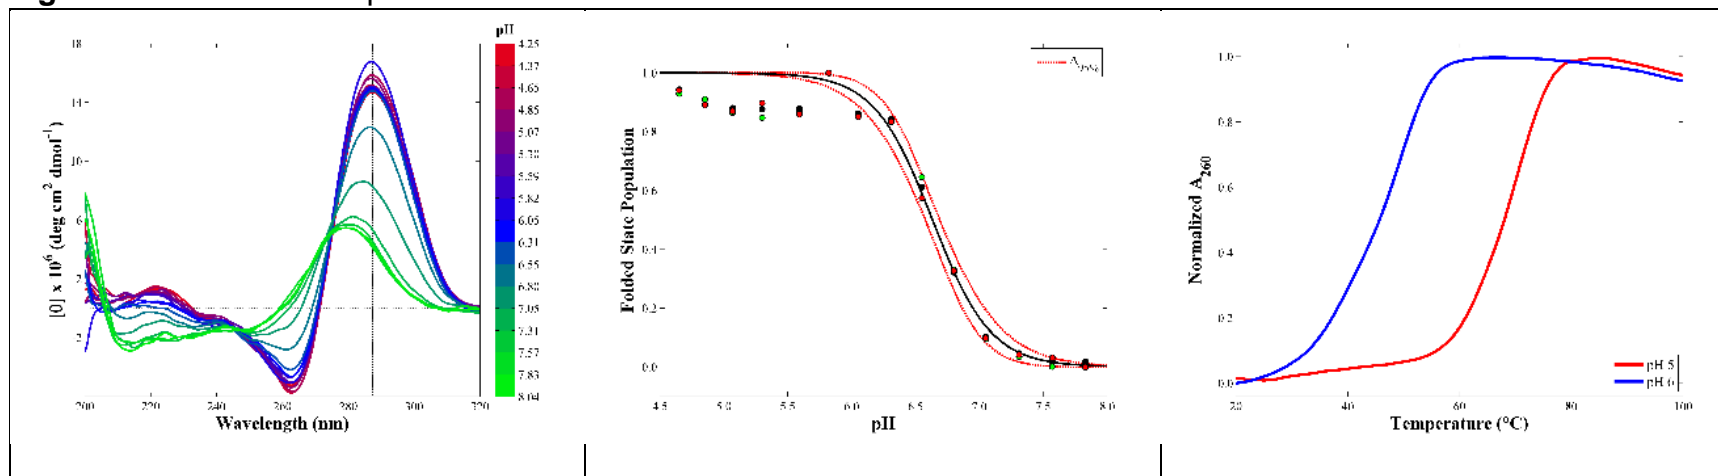

Figure S15: *Polβ*

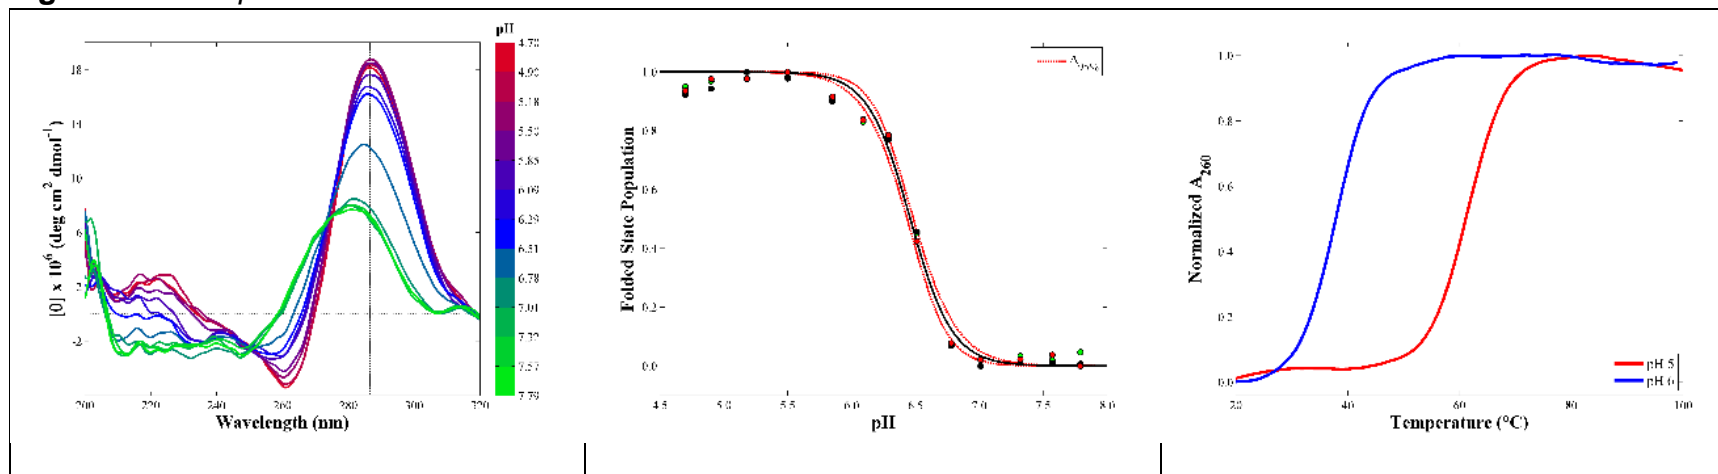

Figure S16: *Polη*

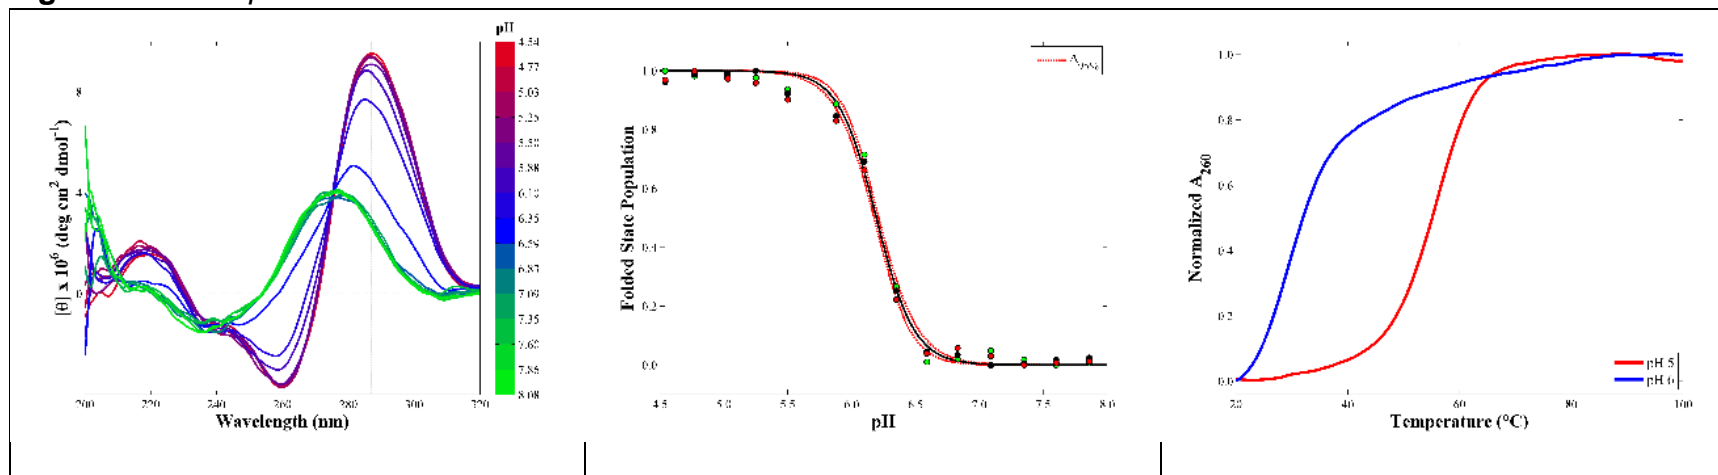

Figure S17: RAD17 – Sequence 1

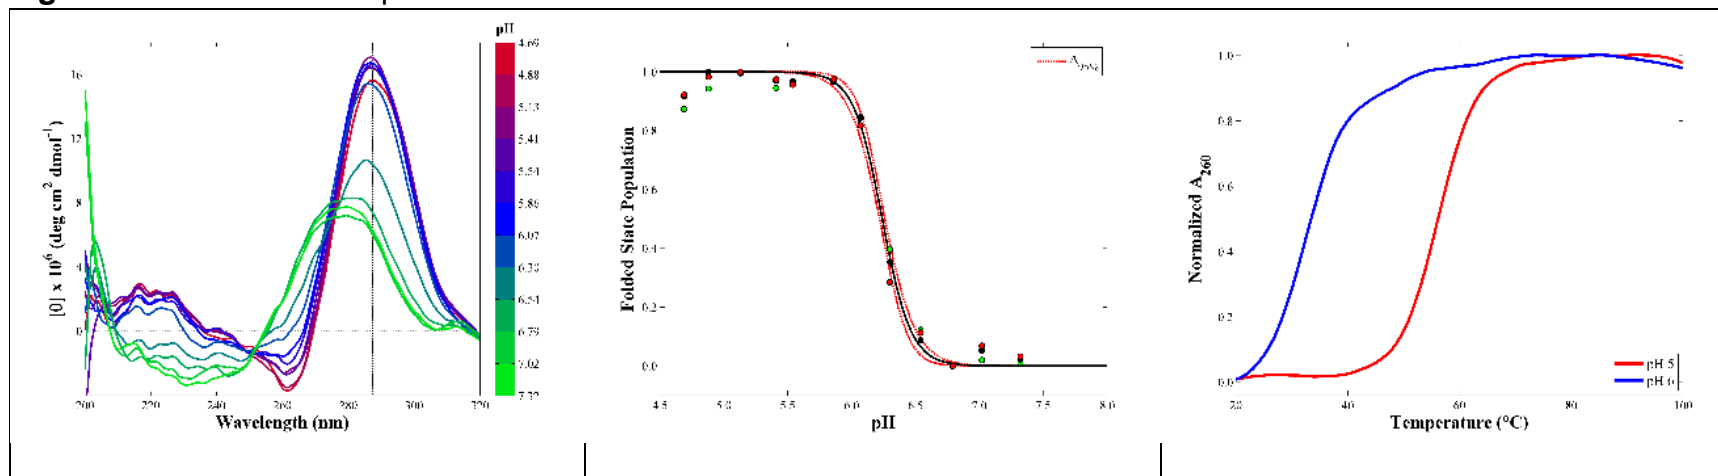

Figure S18: RAD17 – Sequence 2

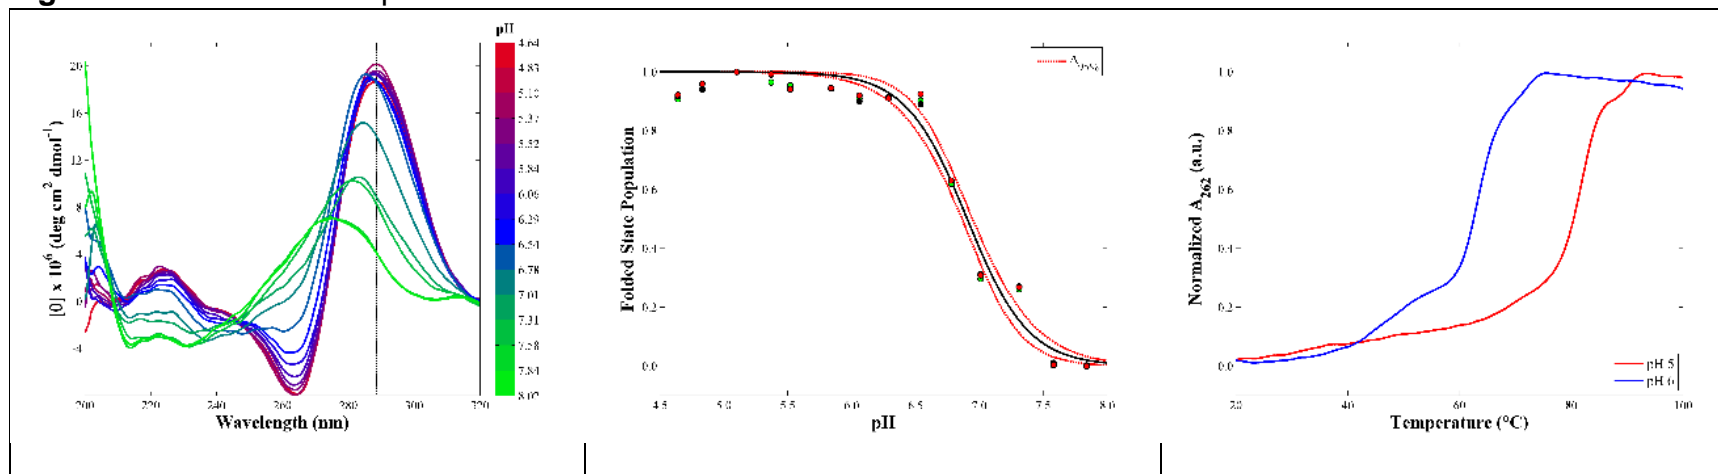

Figure S19: RAD21

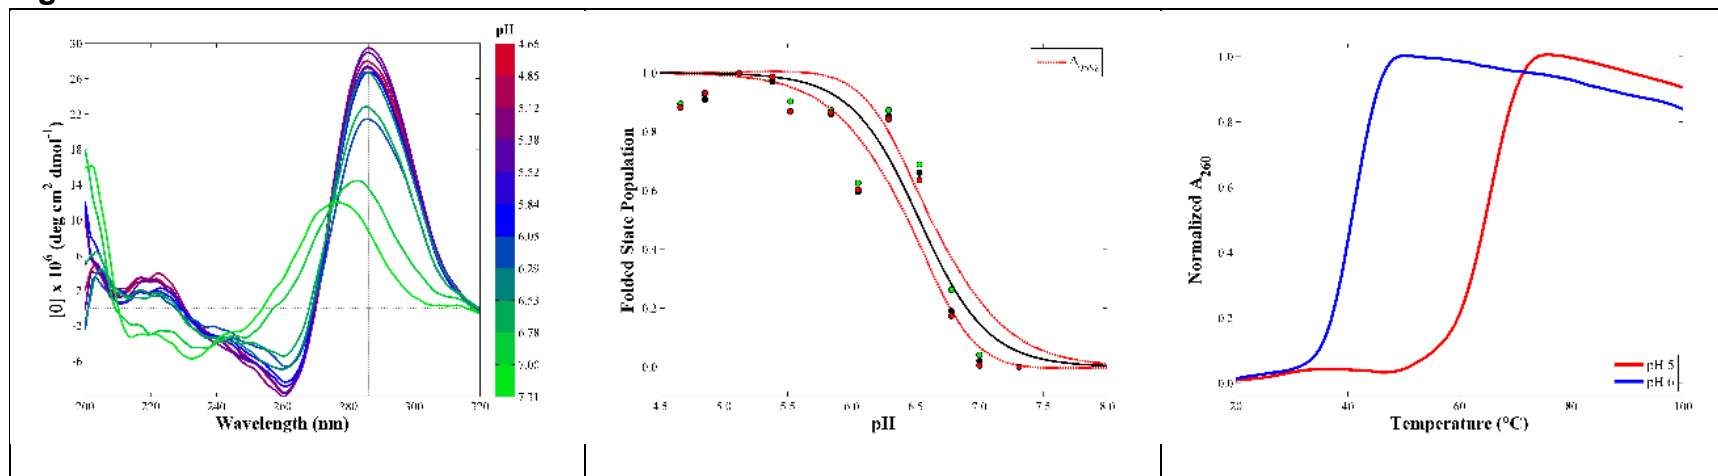

Figure S20: RAD54L

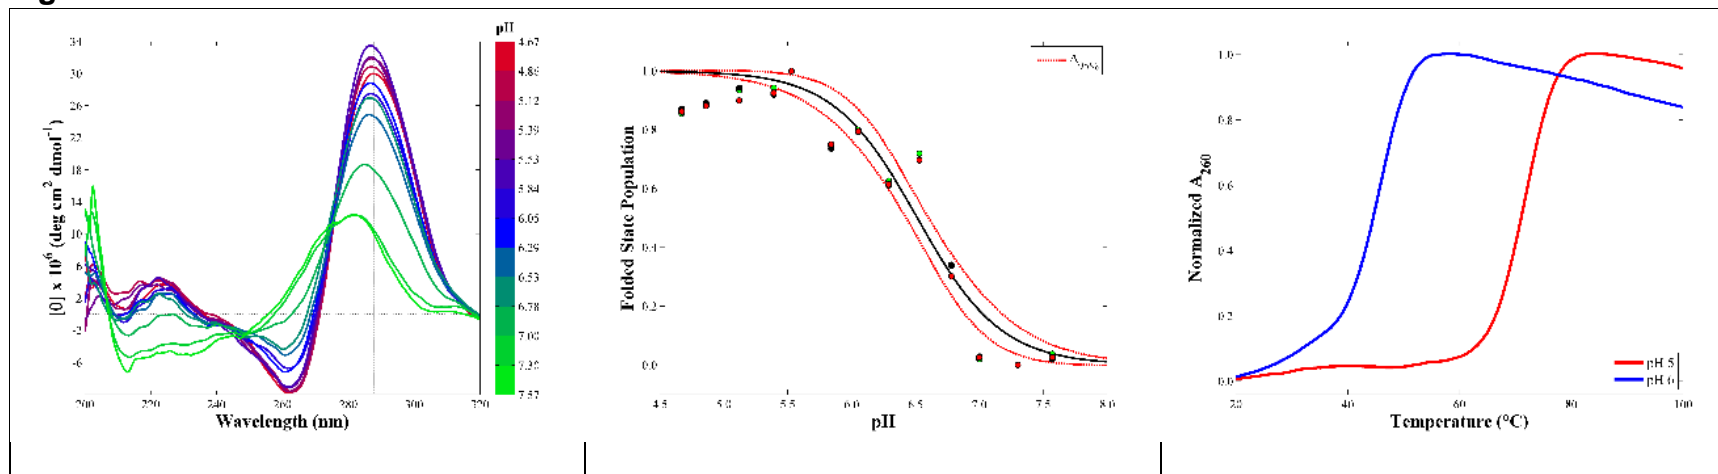

Figure S21: UDG – 4 track

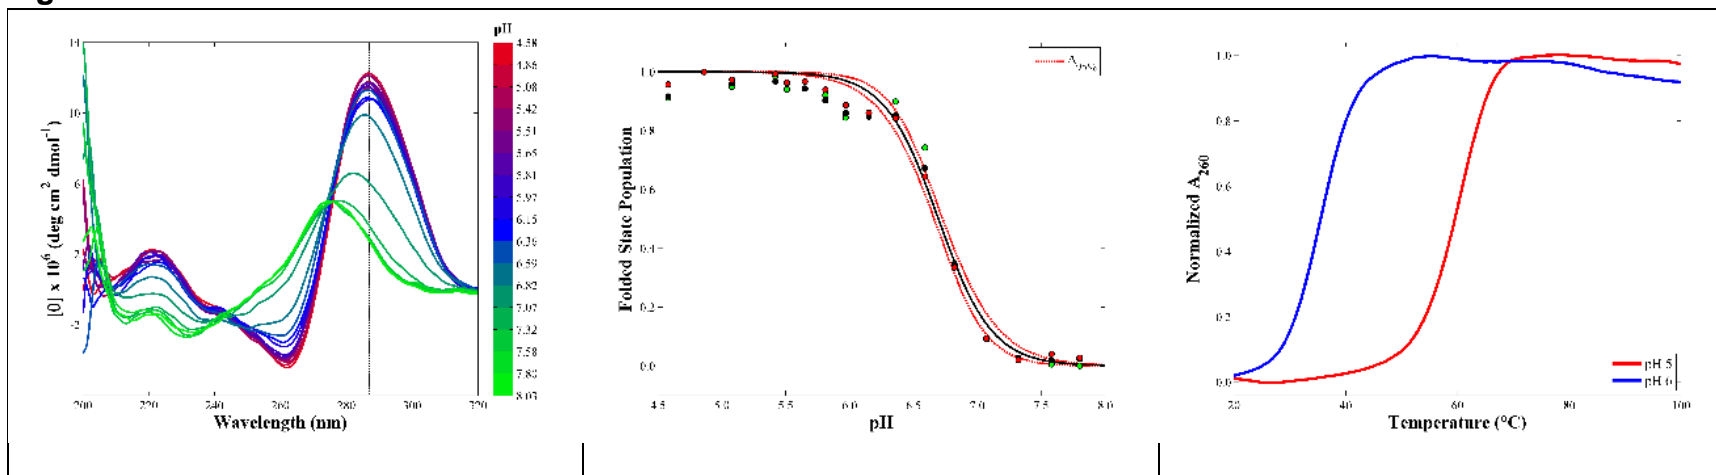

Figure S22: UDG – 5 track

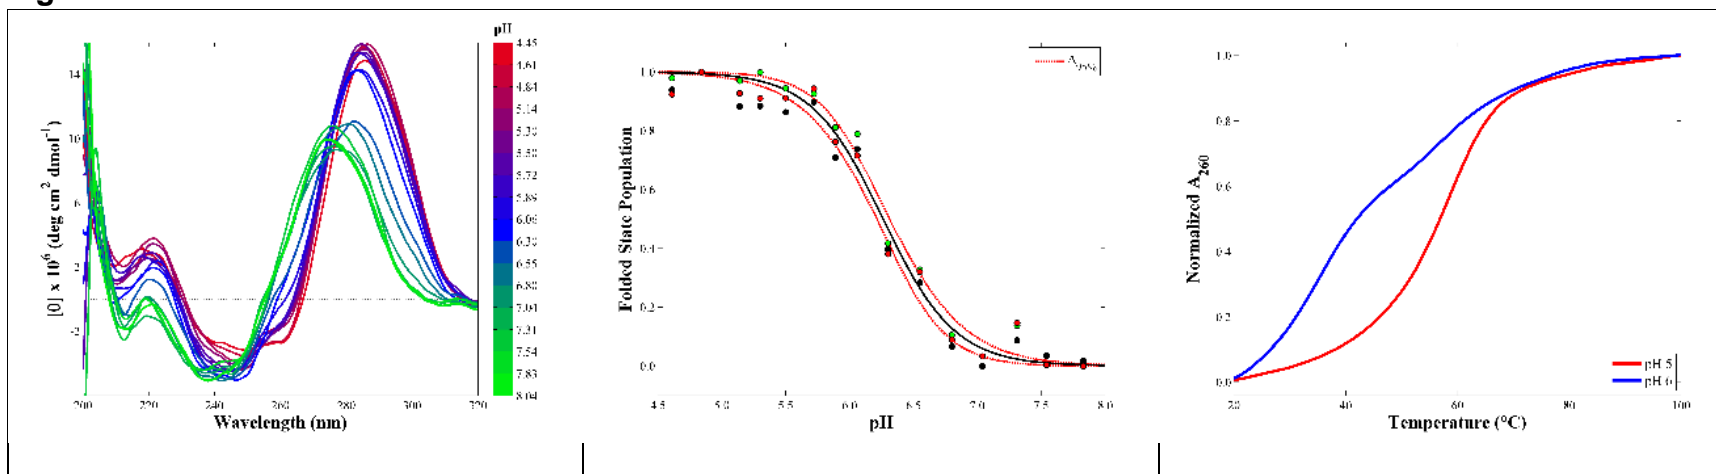

Figure S23: XRCC2

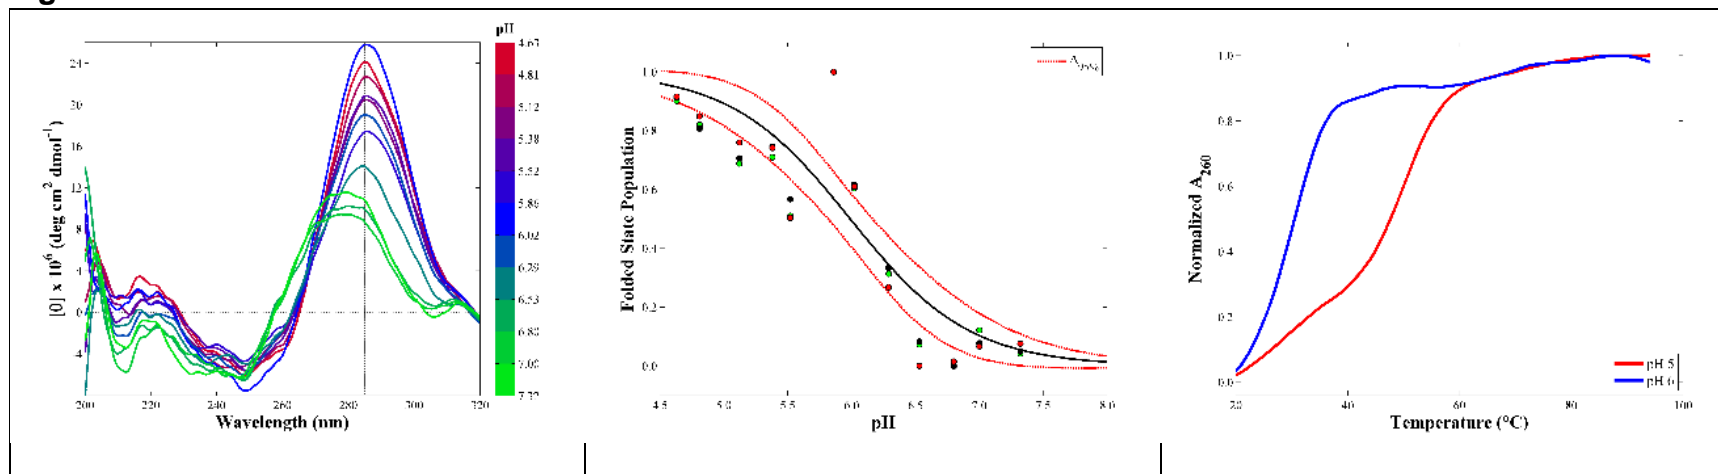

Figure S24: XRCC3

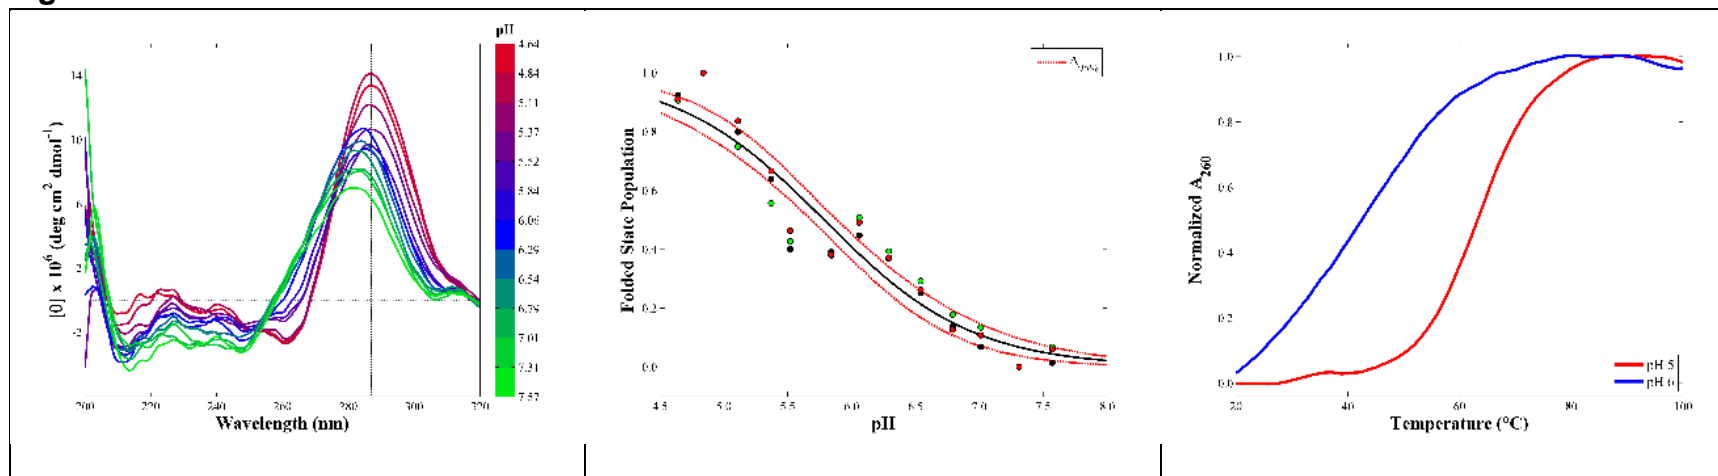

Figure S25: XRCC5

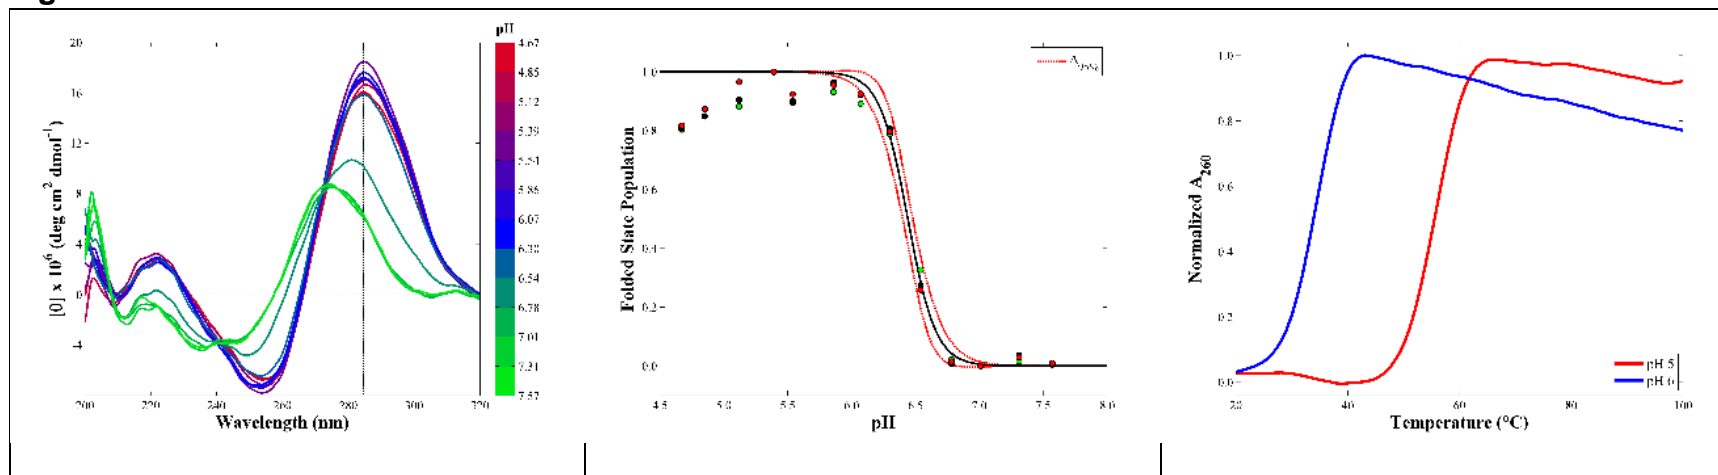

**Figure S26:** Top-to-bottom direct comparison of Figures 1 and 2 in the manuscript for ease of visual comparison of  $pH_T$  values.

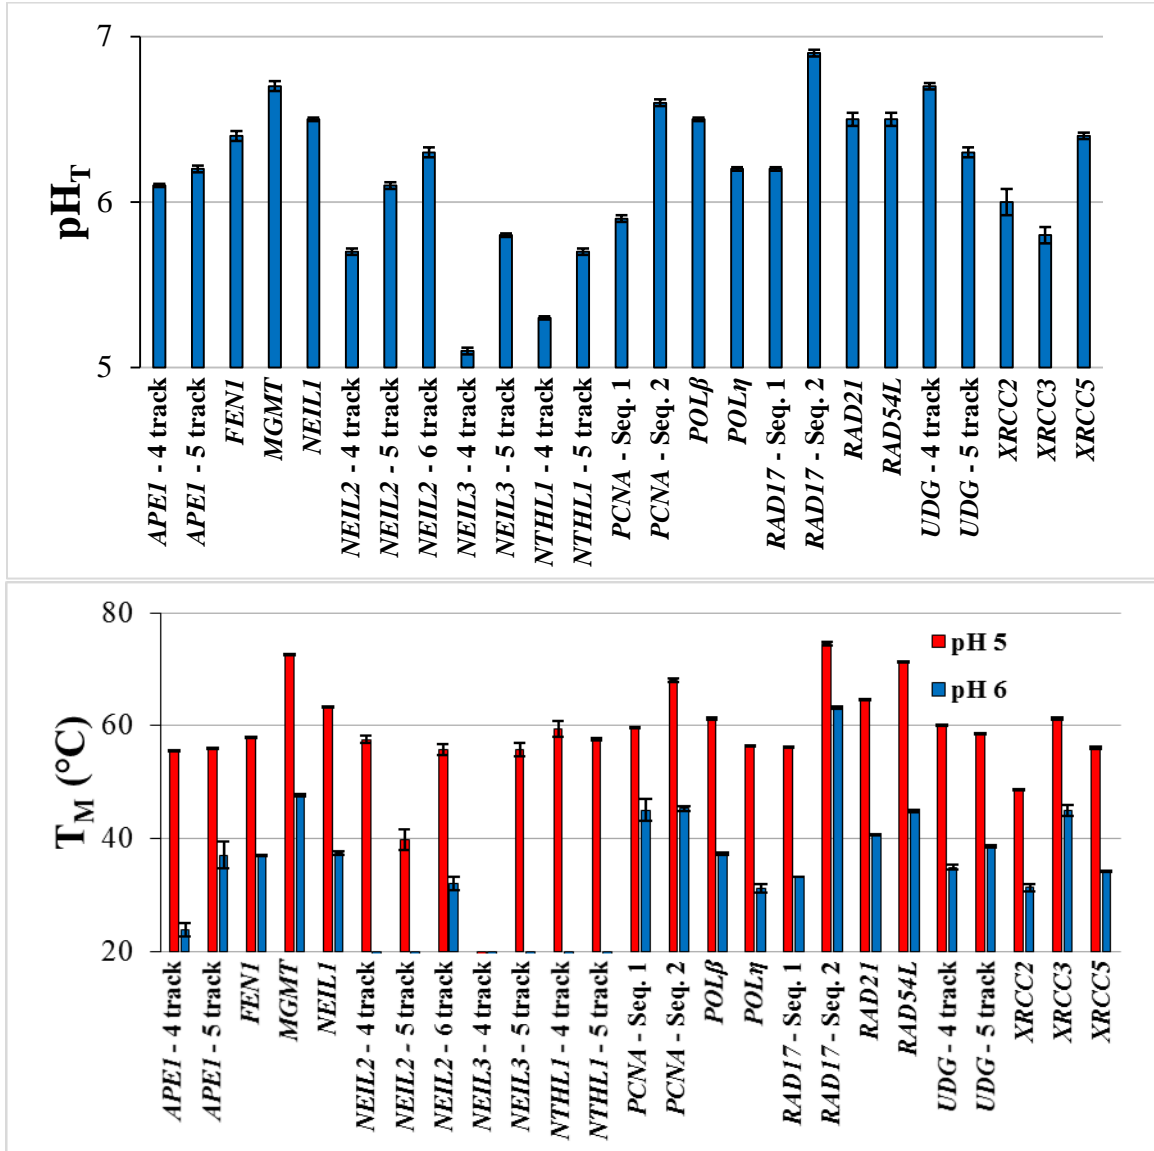

Supplement: ao8b01551_si_001.pdf [file ao8b01551_si_001.pdf]
